# Supplementary material for: HSD3B and Gene-Gene Interactions in a Pathway-Based Analysis of Genetic Susceptibility to Bladder Cancer
Source: PLoS One. 2012 Dec 19;7(12):e51301. doi: 10.1371/journal.pone.0051301 (PMC3526593; doi:10.1371/journal.pone.0051301)
Supplement: Table S1 — Full list of genotyped SNPs organized by functional group. (XLSX) [file pone.0051301.s004.xlsx]

## Sheet: Table S1
Table S1. Full list of genotyped SNPs organized by functional group.
dna_repair	immune	proliferation	apoptosis	metabolism	telomere	hormone	transport_signal	neural
ape1_148	ARHGDIB_01	BARD1_02	AKT1_15	ABCA1_04	TEP1_01	SHBG_01	SEC14L2_01	DRD1_02
APEX1_03	ARHGDIB_03	BARD1_11	APAF1_03	ABCA1_12	TEP1_02	SHBG_05	SEC14L2_04	DRD2_01
APEX1_09	BIC_01	BARD1_18	APAF1_04	ABCA1_15	TEP1_03	SHBG_12	SEC14L2_05	DRD2_03
APEX1_16	BIC_04	BARD1_22	APAF1_07	ABCA1_17	TEP1_08	SHBG_13	SLC19A1_01	DRD2_11
ATM_01	BIC_07	CAV1_02	APAF1_09	ABCA1_23	TEP1_10	HSD17B1_06	SLC19A1_05	DRD4_07
ATM_02	BIC_10	CAV1_05	APOE_03	ABCA1_26	TEP1_11	HSD17B1_09	SLC23A1_05	DRD4_15
ATM_03	BIC_11	CAV1_07	BAK1_05	ABCA1_31	TERF1_01	HSD17B1_10	SLC23A1_09	HTR1B_02
ATM_05	BIC_15	CAV1_09	BAK1_06	ABCA5_01	TERF1_02	HSD17B2_01	SLC23A1_18	HTR1B_07
ATM_06	BIC_21	CAV1_19	BAK1_07	ABCA6_01	TERF1_04	HSD17B2_02	SLC23A1_20	HTR1D_01
ATM_08	BIC_32	CAV1_23	BAX_03	ABCA6_05	TERF1_06	HSD17B4_01	SLC23A2_01	HTR1D_03
ATM_27	BIC_33	CAV1_29	BAX_05	ABCA7_05	TERF1_27	HSD17B4_03	SLC23A2_02	HTR1D_04
ATM_37	BIC_34	CCNA2_01	BCL2L1_01	ABCA7_06	TERF2_01	HSD17B4_08	SLC23A2_03
ATM_38	BPI_01	CCNA2_06	BCL2L1_02	ABCA7_09	TERF2_03	HSD17B4_10	SLC23A2_05
BLM_02	CCL5_03	CCNA2_12	BCL2L1_03	ABCB1_01	TERF2_14	HSD17B4_15	SLC23A2_25
BLM_03	CCL5_04	CCND1_01	BCL6_05	ABCB1_09	TERT_02	HSD17B4_16	SLC23A2_26
BLM_05	CCR2_01	CCND1_02	BCL6_06	ABCB1_12	TERT_03	HSD17B4_17	SLC23A2_31
BLM_06	CCR2_02	CCND1_03	BCL6_07	ABCB11_02	TERT_08	HSD17B4_18	SLC23A2_33
BLM_16	CCR2_06	CCND3_01	BCL6_09	ABCB11_08	TERT_14	HSD17B4_19	SLC23A2_48
BLM_22	CCR3_01	CCND3_02	BCL6_11	ABCC2_01	TERT_15	HSD17B4_21	SLC2A1_01
BLM_25	CCR3_05	CDC25A_04	BIRC2_01	ABCC2_02	TERT_21	HSD3B1_18	SLC2A4_02
BRCA1_01	CCR5_02	CDC25B_06	BIRC3_02	ABCC2_03	TERT_25	HSD3B1_22	SLC2A4_03
BRCA1_05	CCR5_04	CDC25C_01	BIRC3_03	ABCC2_05	TERT_54	HSD3B1_23	SLC30A1_01
BRCA1_06	CCR5_07	CDK4_01	CARD15_04	ABCC2_10	TERT_62b	HSD3B1_24	SLC30A4_01
BRCA1_18	CD14_03	CDK5_08	CARD15_05	ABCC4_04	rs938886	HSD3B1_25	SLC39A2_05
BRCA1_21	CD4_03	CDK5_13	CARD15_09	ABCC4_07	rs2295275	HSD3B1_26	SLC39A2_07
BRCA1_26	CD80_01	CDK5_14	CARD15_10	ABCG8_01	WDR79_06	HSD3B2_07	SLC39A2_10
BRCA1_32	CD80_02	CDK5_16	CARD15_19	ABCG8_02	WDR79_09	HSD3B2_14	SLC4A2_01
BRCA2_01	CD80_04	CDKN1B_04	CASP10_02	ABCG8_06		HSD3B2_19	SLC4A2_02
BRCA2_02	CD81_04	CDKN1C_09	CASP3_02	ADH1C_01		HSD3B2_22	SLC4A2_04
BRCA2_03	CD81_06	CDKN2A_03	CASP3_07	ADH1C_14		HSD3B2_23b	SLC6A3_03
BRCA2_04	CD86_02	CDKN2A_09	CASP3_08	ADH1C_15		HSD3B2_25	SLC6A3_05
BRCA2_06	CD86_03	CDKN2A_11	CASP3_09	ADH1C_16		BZRP_03	SLC6A3_10
BRCA2_25	CFH_01	CDKN2A_12	CASP8_06	ADH1C_18		BZRP_05	SLC6A3_14
BRCA2_31b	CFH_03	CDKN2A_13	CASP8_07	AHR_01		BZRP_09	rs2234632
BRCA2_32	CFH_05	CDKN2A_14	CASP8_08b	AHR_17		AR_12	rs2234636
BRIP1_01	CFH_06	CDKN2A_16	CASP9_01	AHR_19		AR_13	rs2234637
BRIP1_02	CFH_07	CDKN2A_18	CASP9_03	AHRR_02		AR_14	mk_rs56972888
BRIP1_03	CSF1R_02	CDKN2A_19	CASP9_27	AHRR_10		AR_15	rs238388
BRIP1_05	CSF1R_03	CDKN2A_20	CASP9_28	AKR1A1_02		CGA_02	GC_02
BRIP1_09	CSF1R_05	EGF_02	CSF2_02	AKR1C3_01		CGA_03	HIF1AN_02
BRIP1_15	CTLA4_01	EGF_04	CSF3_02	AKR1C3_08		CGA_05	NUBP1_01
CCNH_01	CTLA4_07	EGF_08	CSF3_06	AKR1C3_11		CGA_06	NUBP2_01
CCNH_04	CTLA4_10	EGFR_03b	CTSB_03	AKR1C3_17		NCOA3_01	OCA2_03
CDK7_01	CTLA4_16	EGFR_04	CTSB_10	AKR1C3_19		NCOA3_02	OCA2_07
CHEK1_01	CTLA4_17	EGFR_05	DIO1_01	AKR1C3_21		NCOA3_04	OCA2_23
CHEK1_02	CTLA4_19	EGFR_1808	DIO1_05	AKR1C3_24		NR1H4_05	PCTP_01
CHEK1_03	CTLA4_25	EGFR_529	ESR1_01	AKR1C3_26		NR1H4_18	PCTP_03
ERCC1_01b	GATA3_04	FBXW7_01	ESR1_07	AKR1C3_28		PGR_01	RGS17_01
ERCC1_05	GATA3_04b	FBXW7_02	ESR1_08	AKR1C3_29		PGR_05	RGS17_03
ERCC1_06	GATA3_10	FBXW7_04	ESR1_13	AKR1C3_30		PGR_07	RGS5_01
ERCC2_09	GATA3_21	FBXW7_05	ESR1_14	AKR1C3_31		PGR_11	RGS6_02
ERCC3_02	GATA3_23	FBXW7_44	ESR1_17	AKR1C3_33		PGR_12	RGS6_04
ERCC3_04	GATA3_25	FOXC1_02	ESR1_30	AKR1C3_35		PGR_14	RGS6_05
ERCC4_01	GATA3_27	FOXC1_06	ESR1_31	AKR1C3_36		PGR_15	FOXA1_05
ERCC4_15	GATA3_28	FOXC1_07	ESR1_34	AKR1C4_01		PGR_16	FOXA1_14b
ERCC5_01	GATA3_29	FOXC1_09	ESR2_02	ALAD_01		PGR_17	rs12630592
ERCC5_02b	GATA3_43	FOXC1_13	FOS_02	ALAD_03		PGR_18	rs16830683
ERCC5_05	GATA3_46	FOXC1_22	FOS_06	ALAD_10		PGR_20	rs16830689
ERCC6_04	GATA3_68	FOXC1_23	FOS_08	ALDH2_08		PGR_21	rs17204605
ERCC6_12	GATA3_76	GHR_01	LITAF_01	ALOX12_02		PGR_23	rs17204878
EXO1_01	HFE_01	GHR_03	LITAF_02	ALOX15_02		PGR_24	rs17810302
EXO1_02	HFE_04	GHR_110	MPO_04	ALOX15_12		PGR_26	rs17810676
FANCA_02	HFE_07	GHR_113	MX1_01	ALOX5_02		PGR_27	rs1801133
FANCA_03	HFE_08	GHR_16	MX1_03	ALOX5_06		PGR_28	rs334535
FANCA_12	IFNAR2_01	GHR_21	MX1_04	ALOX5_10		RXRA_01	rs4688047
FANCA_16	IFNAR2_06	GHR_25b	MX1_07	ALOX5_11		RXRA_03	rs6770314
FANCA_22	IFNAR2_10	GHR_27	MX1_08	ALOX5_12		RXRB_02	rs6781942
FANCA_25	IFNG_07	GHR_28	MX1_10	ALOX5_15		RXRB_11	rs9851174
FANCA_28b	IFNGR1_01	GHR_29	MX1_11	ALOX5_26			SEP15_02
FANCA_34	IFNGR1_05	GHR_30	MX1_22	ALOX5_28			SEP15_04
FANCA_35	IFNGR2_03	GHR_31	MX1_28	AMACR_01			SEPP1_01
FANCA_37	IL10_01	GHR_33	NFKB1_01	AMACR_02			SEPP1_02
FANCA_39	IL10_03	GHR_34	NFKB1_02	AMACR_03			UCP3_01
HUS1_01	IL10_05	GHR_45	NFKB1_09	AMACR_05			UCP3_02
HUS1_05	IL10_06	GHR_46	NFKB1_14	AMACR_08			VDR_07
LIG1_01	IL10_07	GHR_47	NFKB1_21	AMACR_09			VDR_12
LIG1_02	IL10_13	GHR_50	NFKB1_33	AMACR_17			VIL2_02
LIG1_03	IL10_17	GHR_77	NFKBIE_01	AMT_01			VIL2_03
LIG1_18	IL10RA_02	GHR_79	NFKBIE_02	AMT_06b			ZNF230_01
LIG1_29	IL10RA_08	GHR_90	NFKBIE_03	AMT_10b			APC_03
LIG3_08	IL12A_09	GRPR_01	NFKBIE_08	APOA2_02			APC_09
LIG4_01	IL12B_04	GRPR_02	PAK6_13	APOA2_04			APC_13
MGMT_03	IL12B_11	HSPB8_01	PAK6_14	APOA2_06			APC_19
MGMT_06	IL13_01	HSU24186_01	PAK6_16	APOA4_02			APC_26
MGMT_12	IL13_02	ICAM1_06	PAK6_19	APOA4_07			AXIN2_03
MGMT_19	IL13_03	ICAM1_15	PAK6_24	APOB_01			AXIN2_09
MLH1_02	IL13_06	ICAM1_16	PAK6_43	APOB_04			AXIN2_10
MLH1_05	IL15_01	ICAM1_19	PIM1_01	APOB_07			AXIN2_11
MSH2_03	IL15_02	IGF1_04	PIM1_03	APOB_08			AXIN2_12
MSH2_06	IL15_06	IGF1_11	PIM1_17	APOB_21			AXIN2_13
MSH2_08	IL15_07	IGF1_15	PIM1_25	ATP1B2_01			AXIN2_14
MSH2_09	IL15_10	IGF1_16	PLA2G6_02	ATP1B2_04			GSK3B_01
MSH2_10	IL15RA_02	IGF1_22	PLA2G6_08	ATP1B2_13			GSK3B_03
MSH2_12	IL15RA_04	IGF1_24	PLA2G6_10	BHMT_01			GSK3B_04
MSH2_13	IL15RA_05	IGF1_27	PLA2G6_12	BHMT_02			GSK3B_05
MSH2_14	IL15RA_06	IGF1_44	PPP1R13L_01	BHMT_04			GSK3B_07
MSH2_15	IL1A_01	IGF1_46	PTH_01	CAT_02			GSK3B_08
MSH2_16	IL1A_04	IGF1R_01	PTH_03	CAT_03			GSK3B_09
MSH2_18	IL1B_01	IGF1R_05	PTH_04	CAT_05			GSK3B_11
MSH2_19	IL1B_02	IGF1R_06	SCARB1_01	CAT_06			GSK3B_12
MSH2_20	IL1B_03	IGF1R_12	SCARB1_02	CAT_07			GSK3B_14
MSH2_21	IL1B_08	IGF1R_18	SCARB1_03	CAT_15			GSK3B_15
MSH3_01b	IL1B_09	IGF1R_26	SCARB1_08	CBR1_01			GSK3B_18
MSH3_02	IL1B_12	IGF1R_27b	SCARB1_09	CBR1_10			GSK3B_19
MSH3_03	IL1RN_02	IGF2_02	SRA1_03	CBR1_11			GSK3B_20
MSH3_07	IL1RN_04	IGF2_03	SRA1_04	CBR3_01			GSK3B_22
MSH3_09	IL1RN_05	IGF2_09	SRA1_05	CBS_01			GSK3B_23
MSH3_12	IL2_01	IGF2_16	SSTR3_01	CBS_03			GSK3B_25
MSH3_29	IL2_03	IGF2_22	SSTR3_03	CBS_07			GSK3B_31
MSH6_01	IL3_01	IGF2AS_01	TP53I3_03	CETP_08			GSK3B_34
MSH6_04	IL4_01	IGF2AS_03	TP53I3_10	CETP_21			GSK3B_35
NBS1_01b	IL4_02	IGF2AS_04b	TP53I3_12	CETP_23			GSK3B_37
NBS1_02b	IL4_03	IGF2R_02	TP53I3_13	COMT_01			GSK3B_38
NBS1_04b	IL4_10	IGF2R_03	TP53I3_18	COMT_03			GSK3B_41
NBS1_13b	IL4_11	IGF2R_04	TP73L_03	COMT_16			GSK3B_43
OGG1_12	IL4R_02	IGF2R_05	TP73L_13	COMT_28b			GSK3B_44
OGG1_13	IL4R_03	IGF2R_07	TP73L_15	COMT_29			GSK3B_45
PARP1_01	IL4R_05	IGF2R_11	TP73L_16	COMT_43b			TNKS_01
PARP1_06	IL4R_07	IGFALS_24	TP73L_17	COMT_58b			TNKS_03
PARP1_10	IL4R_10	IGFALS_35	TP73L_26	CTH_01			TNKS_05
PARP1_12	IL4R_24	IGFALS_35b	TP73L_28	CTH_03			TNKS_110
PARP1_13	IL4R_27	IGFBP1_01	TP73L_46	CTH_07			TNKS_124
PARP1_14	IL6_01	IGFBP2_25	TP73L_47	CTH_10			TNKS_13
PARP4_01	IL6_04	IGFBP2_26	TP73L_52	CTH_13			TNKS_15
PARP4_03	IL6R_04	IGFBP2_29	rs7208422	CTH_14			TNKS_18
PARP4_17	IL7R_01	IGFBP3_04	TP53_01	CYP17A1_01			TNKS_20
PARP4_19	IL7R_08	IGFBP5_05	TP53_09	CYP17A1_08			TNKS_22
PARP4_23	IL8_01	IGFBP5_10	TP53_11	CYP17A1_10			TNKS_23
PCNA_06	IL8_05	IGFBP6_11b	TP53_14	CYP17A1_11			TNKS_26
PCNA_07	IL8_11	IGFBP6_17	TP53_66	CYP17A1_12			TNKS_33
PCNA_10	IL8RA_04	IGFBP6_18	TP53_69	CYP17A1_13			TNKS_34
PMS1_15	IL8RB_01	IGFBP6_19	FLJ10385_08	CYP19A1_01			TNKS_35
PMS1_24	IRF1_03	KRAS_01	FLJ10385_11	CYP19A1_04			TNKS_36
PMS1_26	IRF1_05	KRAS_02	PTEN_01	CYP19A1_06			TNKS_38
PMS1_27	IRF3_01	KRAS_03	PTEN_10	CYP19A1_08			TNKS_46
PMS1_28	IRF3_02	KRAS_04		CYP19A1_09			TNKS_64
PMS1_31	IRF3_12	KRAS_05		CYP19A1_14			TNKS_76
PMS1_47	JAK3_01	KRAS_06		CYP19A1_15			CTNNB1_01
PMS1_48	JAK3_02	KRAS_07		CYP19A1_16			CTNNB1_02
PMS1_49	JAK3_12	KRAS_08		CYP19A1_27			CTNNB1_03
PMS1_50	LEP_01	KRAS_09		CYP19A1_29			CTNNB1_07
PMS1_51	LEPR_01	KRAS_10		CYP19A1_30			CTNNB1_08
PMS1_52	LEPR_03	KRAS_11		CYP19A1_34			CTNNB1_11
PMS1_53	LEPR_04	KRAS_12		CYP19A1_36			CTNNB1_13
PMS1_54	LEPR_08	KRAS_13		CYP19A1_37			CTNNB1_14
PMS1_56	LMO2_01	KRAS_14		CYP19A1_38			CTNNB1_15
PMS1_57	LMO2_04	KRAS_15		CYP19A1_39			CTNNB1_16
PMS1_61	LMO2_08	KRAS_16		CYP19A1_40			CTNNB1_17
PMS1_62	LMOD1_03	KRAS_17		CYP19A1_41			CTNNB1_19
PMS1_63	LTA_01	KRAS_18		CYP1A1_14			CTNNB1_21
PMS2_01	LTA_05	KRAS_19		CYP1A1_15			FZD7_06
PMS2_10	MASP1_01	KRAS_20		CYP1A1_78			FZD7_10b
PMS2_11	MASP1_07	KRAS_21		CYP1A1_81			FZD7_15
POLB_05	MASP1_09	KRAS_22		CYP1A1_91			FZD7_16
POLB_08	MASP1_21	MDM2_01		CYP1B1_03			FZD7_17
POLB_16	MASP1_42	MET_01		CYP1B1_07			FZD7_20
POLD1_13	MASP1_43	MET_04		CYP1B1_08			CALCR_01
RAD23B_02	MASP1_44	MET_13		CYP1B1_18			CALCR_03
RAD23B_03	MASP1_45	MET_26		CYP1B1_27			CASR_01
RAD23B_04	MASP1_46	MYBL2_03		CYP1B1_28			CASR_05
RAD23B_05	MASP1_47	MYBL2_06		CYP1B1_31			CASR_06
RAD51_01	MASP1_48	MYBL2_09		CYP1B1_99b			CASR_07
RAD51_15	MASP1_49	MYBL2_19		CYP24A1_01			CASR_09
RAD51_16	MASP1_50	MYBL2_30		CYP24A1_03			CASR_11
RAD51_17	MASP1_52	MYBL2_31		CYP24A1_05			CASR_15
RAD51_20	MASP1_53	MYBL2_36		CYP24A1_08			LDLR_01
RAD51_21	MASP1_54	MYBL2_46		CYP27B1_01b			LDLR_03
RAD51_22	MBL2_03	MYC_02		CYP2C19_03			LDLR_08
RAD51_23	MBL2_06	PHB_02		CYP2C19_08			LDLR_12
RAD51_24	MBL2_09	PIN1_01		CYP2D6_52			LDLR_18
RAD52_01	MBL2_11	PIN1_02		CYP2D6_65
RAD52_07	MBL2_12	PIN1_16		CYP2E1_02
RAD54L_04	MBL2_27	PIN1_17		CYP2E1_07
SOD1_01	MBL2_30	PIN1_21		CYP2E1_31
SOD2_01	MBL2_38	PLK1_15		CYP3A4_57
SOD2_06	MBL2_44	POT1_02		CYP3A7_01
SOD3_05	MBL2_46	POT1_03		CYP7B1_01
TYMS_01	MBL2_65	POT1_05		CYP7B1_02
TYMS_05	MSR1_01	POT1_07		CYP7B1_03
TYMS_10	MSR1_02	POT1_09		CYP7B1_06
XPA_02	OPRD1_03	POT1_10		DHDH_02
XPA_6	OPRD1_05	POT1_11		DHDH_03
XPC_01	OPRM1_01	POT1_16		DHFR_07
XPC_03	OPRM1_02	POT1_18		DHFR_11
XPC_08	OPRM1_03	POT1_37		ENPP1_04
xpc_pat	OPRM1_23	RB1CC1_10		EPHX1_01
xpd_312	P2RX7_10	RB1CC1_24b		EPHX1_06
xpd_751	PPARG_06	RB1CC1_40		EPHX1_10
xrcc1_194	PPARG_07	RB1CC1_50		EPHX1_12
xrcc1_280	PPARG_11	RERG_03		EPHX1_14
xrcc1_399	RAG1_01	RERG_10		EPHX1_15
xrcc1_632	rs698095	RERG_24		EPHX1_17
xrcc1_1678	SLAMF1_02	RERG_29		EPHX1_18
xrcc1_26602	SLAMF1_03	RERG_30		EPHX1_20
XRCC1_01	SLAMF1_04	RERG_31		EPHX2_04
XRCC1_07	TGFBR1_01	RERG_33		FTHFD_01b
xrcc3_241	TGFBR1_03	RERG_36		FTHFD_03b
XRCC3_03	TGFBR1_04	RERG_37		FTHFD_06b
XRCC3_04	TLR2_04	RERG_41		GPX1_03b
XRCC4_01	TLR2_05	RERG_44		GPX1_06
XRCC4_04	TLR2_06	RERG_47		GPX2_02
XRCC4_05	TNFRSF6_01b	ROS1_03		GPX2_07
XRCC4_07	TNFRSF6_04b	ROS1_04		GPX2_09
XRCC4_10	TNFRSF6_09b	ROS1_12		GPX2_13
XRCC5_02	XBP1_01	ROS1_14		GPX2_14
XRCC5_12	XBP1_02	ROS1_15		GPX2_16
XRCC5_14	XBP1_09	ROS1_18		GPX2_17
XRCC5_17	XBP1_10	ROS1_20		GPX2_18
XRCC5_19	rs2289965	rs5743072		GPX2_19
rs1799802	TNFSF6_01	SCUBE2_02		GPX2_21
rs1800067	TNFRSF5_01	SCUBE2_03		GPX3_04
rs2020908	TNFRSF1A_02	SCUBE2_13		GPX3_16
rs35717727	TGFB1_03	STAT1_01		GPX3_18
MGC29463_01	TGFB1_05	STK11_03		GPX3_21
WRN_01	TGFB1_09	STK6_02b		GPX3_25
WRN_03b	CX3CR1_01	STK6_03b		GPX3_28
WRN_04	CX3CR1_02	STK6_04b		GPX4_06
WRN_07	CYBB_09	STK6_06b		GPX4_08
WRN_08	CYBB_11	STK6_08		GPX4_09
ZNF350_04	CYBB_27	STK6_15b		GPX4_12
ZNF350_06	CYBB_28	STK6_16		GSTA4_01
ZNF350_08	EDN1_01	TSG101_07		GSTA4_02
rs1801320	EDN1_02	TSG101_28		GSTA4_04
rs2303428	MEST_03	TSG101_30		GSTA4_07
	NCF2_04	TSG101_33		GSTM3_01
	NCF2_05	TSG101_36		GSTM3_05
	RNASEL_01	TSG101_40		GSTM3_06
	RNASEL_02	asa_rs5601842		GSTP1_01
	SELE_01	rs602652		GSTP1_02
	SFTPD_01	rs640573		gstp1_105
	SFTPD_03	rs568419		gstp1_114
	TNF_02	rs966185		GSTZ1_02
	TNF_09	rs997669		GSTZ1_03
	TNF_12	rs1154232		HADHA_01
	TNF_13	rs2961663		HADHA_05
	TNIP1_01	rs3218036		HADHA_10
	TNIP1_02	rs3218076		LCAT_03
	VCAM1_02	rs3862792		LCAT_04
	VCAM1_05	rs4561519		LCAT_05
	VCAM1_38	rs6069717		LIPC_01
	VEGF_04	rs10818504		LIPC_02
	VEGF_05	rs12507582		LIPC_04
	VEGF_19	rs33923703		LIPC_06
	ZFPM1_07	TFF1_01		LIPC_08
		TFF3_02		LIPC_09
		INSR_01		LIPC_17
		INSR_05		LIPC_23
		INSR_06		LIPC_25
		INSR_07		LIPC_37
		INSR_11		LPL_01
		INSR_13		LPL_03
		INSR_19		LPL_04
		INSR_28		LPL_05
		INSR_30		LPL_06
		INSR_51		LPL_08
		INSR_59		LPL_09
		INSR_61		LRP5_01
		IRS1_03		LRP5_04
		IRS1_04		LRP5_06
		IRS1_08		LRP5_07
		CSTF1_08		LRP5_12
		CSTF1_10		LRP5_15
		CSTF1_21		LRP6_02
		CSTF1_22		LRP6_03
		BCR_01		MAOA_01
		BCR_02		MTHFD2_01
		COL18A1_01		MTHFR_02
		COL18A1_02		MTHFR_03
		COL18A1_03		MTHFR_07
		EFNB3_01		mth677
		EFNB3_02		mth1298
		FLJ32954_01		MTRR_05
		FLJ32954_02		MTRR_07
		GDF15_01		MTRR_10
		GDF15_02		MTRR_11
		KRT23_03		MTRR_19
		KRT23_04		MTRR_22
		MATR3_01		NOS2A_02
		MBD2_01		NOS2A_07
		MBD2_02		NOS3_01
		MBD2_03		NOS3_34
		MBD2_04		NQO1_07
		MBD4_02		NQO1_08
		MYNN_01		NQO1_15
		MYO5A_01		PTGS1_02
		MYO5A_06		PTGS2_05
		MYO5A_07		PTGS2_08
		NEDD5_01		PTGS2_19
		NINJ1_01		PTGS2_33
		NINJ1_03		PTGS2_44
		PDGFB_05		SULT1A2_09
		PTCH_1315		asa_rs15032
		PTCH_2560		rs1208
		RAB15_02		rs1695
		RAB15_03		rs156697
		RAB15_04		rs723077
		RAC1_03		rs1046428
		RET_01		rs1046778
		RET_02		rs1177699
		VEGF_04		rs1799929
		VEGF_05		rs1801280
		VEGF_19		rs2070676
		rs664143		rs2228332
		rs1798794		rs3177427
				rs3740391
				rs3740392
				rs3740393
				rs7085854
				rs8192766
				rs10152640
				rs10745623
				rs10748835
				rs11191439
				rs11191454
				rs45455492
				rs45520831
				gstm1_ex45del
				gstt1_ex34del
				TYR_08b
				TFRC_01
				FUT2_05
				GGH_01
				GGH_02
				HMGCR_01
				HMGCR_02
				MPDU1_01
				PLA2G2A_03
				SAT2_01
				SAT2_03
				SOAT2_01
				SOAT2_09
				TGM1_01
				TGM1_02
				TYR_02
				UGT1A1_24
				rs1805087
				rs2228099
				rs2256355
				rs2864873
